# Supplementary material for: On the existence of the H3 tautomer of adenine in aqueous solution. Rationalizations based on hybrid quantum mechanics/molecular mechanics predictions
Source: Royal Society of Chemistry journal article supplement (doi:10.1039/b915604f), 2009-11-28
Supplement: b915604f.pdf [file b915604f.pdf]

On the existence of the H3 tautomer of adenine in aqueous solution.  
Rationalizations based on hybrid quantum mechanics/molecular  
mechanics predictions

Supporting Information

Kęstutis Aidas, Kurt V. Mikkelsen  
*Department of Chemistry, H. C. Ørsted Institute, University of Copenhagen,  
Universitetsparken 5, DK-2100 Copenhagen Ø, Denmark*

Jacob Kongsted\*  
*Department of Physics and Chemistry, University of Southern Denmark,  
Campusvej 55, DK-5230 Odense M, Denmark*

\*e-mail: kongsted@ifk.sdu.dk

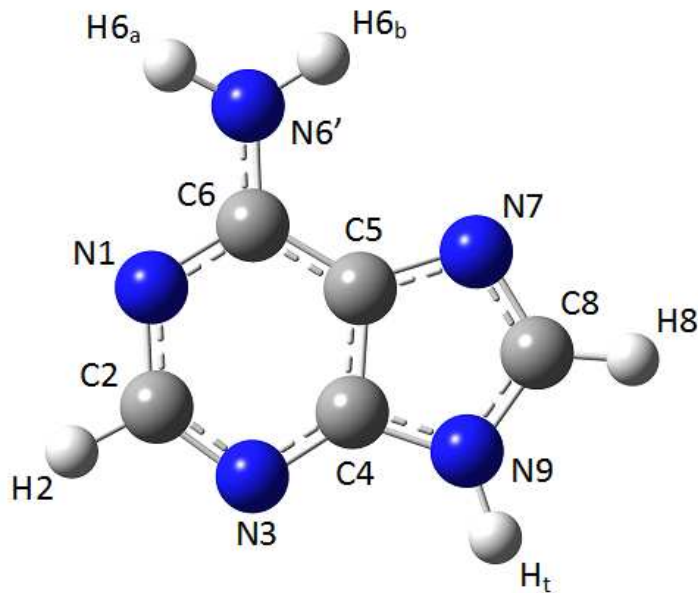

Figure 1: The atom labeling in adenine. The H<sub>t</sub> proton is bonded to N9, N7 and N3 in the H9-A, H7-A and H3-A tautomers of adenine, respectively.

Table 1: The  $xyz$  coordinates (in Å) of the H9-A tautomer of adenine optimized using MP2/aug-cc-pVTZ method in  $C_s$  and  $C_1$  symmetries.

| Atom            | x         | y         | z         |
|-----------------|-----------|-----------|-----------|
| $C_s$           |           |           |           |
| N1              | 1.643187  | -1.123608 | 0.000000  |
| N3              | -0.636609 | -1.783016 | 0.000000  |
| N6'             | 2.341180  | 1.062407  | 0.000000  |
| N7              | -0.640229 | 1.763829  | 0.000000  |
| N9              | -2.126024 | 0.124109  | 0.000000  |
| C2              | 0.654169  | -2.004565 | 0.000000  |
| C4              | -0.910883 | -0.487128 | 0.000000  |
| C5              | 0.000000  | 0.538649  | 0.000000  |
| C6              | 1.346285  | 0.166102  | 0.000000  |
| C8              | -1.882508 | 1.469813  | 0.000000  |
| H2              | 0.958133  | -3.034439 | 0.000000  |
| H6 <sub>a</sub> | 3.278106  | 0.745200  | 0.000000  |
| H6 <sub>b</sub> | 2.142535  | 2.031091  | 0.000000  |
| H8              | -2.682938 | 2.179419  | 0.000000  |
| H <sub>t</sub>  | -3.008751 | -0.324548 | 0.000000  |
| $C_1$           |           |           |           |
| N1              | 1.922501  | 0.515156  | 0.001616  |
| N3              | -0.009480 | 1.893201  | 0.000128  |
| N6'             | 1.857147  | -1.779705 | -0.022245 |
| N7              | -1.188532 | -1.451767 | 0.000180  |
| N9              | -2.046935 | 0.587808  | 0.000657  |
| C2              | 1.281636  | 1.674489  | 0.001942  |
| C4              | -0.697986 | 0.761588  | -0.000995 |
| C5              | -0.178487 | -0.508196 | -0.002324 |
| C6              | 1.214928  | -0.602948 | -0.003314 |
| C8              | -2.263075 | -0.762516 | 0.001482  |
| H2              | 1.909843  | 2.545298  | 0.004897  |
| H6 <sub>a</sub> | 2.842007  | -1.787258 | 0.073528  |
| H6 <sub>b</sub> | 1.347647  | -2.622252 | 0.073268  |
| H8              | -3.253388 | -1.166711 | 0.003436  |
| H <sub>t</sub>  | -2.731115 | 1.303567  | 0.001768  |

Table 2: The  $xyz$  coordinates (in Å) of the H9-A, H7-A and H3-A tautomers of adenine fully optimized using MP2/aug-cc-pVTZ/PCM method in aqueous solution.

| Atom            | x         | y         | z         |
|-----------------|-----------|-----------|-----------|
| H9-A            |           |           |           |
| N1              | 1.936876  | 0.541445  | 0.001513  |
| N3              | -0.045191 | 1.921972  | 0.001090  |
| N6'             | 1.892853  | -1.780707 | -0.043620 |
| N7              | -1.150632 | -1.485898 | -0.001906 |
| N9              | -2.076697 | 0.562356  | 0.002280  |
| C2              | 1.272159  | 1.714693  | 0.001733  |
| C4              | -0.722813 | 0.762913  | -0.000125 |
| C5              | -0.170166 | -0.521506 | -0.002723 |
| C6              | 1.235136  | -0.603204 | -0.002392 |
| C8              | -2.279356 | -0.783663 | 0.001133  |
| H2              | 1.897873  | 2.602814  | 0.004710  |
| H6 <sub>a</sub> | 2.891080  | -1.775587 | 0.138241  |
| H6 <sub>b</sub> | 1.382771  | -2.635291 | 0.148518  |
| H8              | -3.275573 | -1.207961 | 0.002725  |
| H <sub>t</sub>  | -2.806369 | 1.286453  | 0.004553  |
| H7-A            |           |           |           |
| N1              | 1.947906  | 0.483621  | -0.000876 |
| N3              | 0.022139  | 1.938817  | 0.003703  |
| N6'             | 1.826027  | -1.835810 | -0.053498 |
| N7              | -1.257130 | -1.322408 | -0.004404 |
| N9              | -2.104868 | 0.756467  | 0.004414  |
| C2              | 1.326462  | 1.684450  | -0.000278 |
| C4              | -0.730136 | 0.818559  | 0.003809  |
| C5              | -0.188522 | -0.474228 | -0.000554 |
| C6              | 1.208139  | -0.630618 | -0.001178 |
| C8              | -2.372984 | -0.540389 | -0.001206 |
| H2              | 1.989505  | 2.545067  | -0.000227 |
| H6 <sub>a</sub> | 2.821740  | -1.843165 | 0.148231  |
| H6 <sub>b</sub> | 1.309680  | -2.666170 | 0.218805  |
| H8              | -3.364322 | -0.976122 | -0.003337 |
| H <sub>t</sub>  | -1.252881 | -2.351071 | -0.012396 |
| H3-A            |           |           |           |
| N1              | 1.934225  | 0.458665  | -0.000538 |
| N3              | 0.016186  | 1.832656  | 0.000460  |
| N6'             | 1.802264  | -1.845644 | -0.001257 |
| N7              | -1.230743 | -1.469870 | -0.000233 |
| N9              | -2.138667 | 0.666242  | 0.000270  |
| C2              | 1.342823  | 1.639507  | -0.000113 |
| C4              | -0.796525 | 0.738928  | 0.000277  |
| C5              | -0.226146 | -0.546885 | -0.000173 |
| C6              | 1.172437  | -0.668427 | -0.000282 |
| C8              | -2.331528 | -0.684758 | -0.000302 |
| H2              | 1.955565  | 2.535669  | -0.000079 |
| H6 <sub>a</sub> | 2.816410  | -1.876154 | 0.005037  |
| H6 <sub>b</sub> | 1.274550  | -2.710927 | 0.007432  |
| H8              | -3.330270 | -1.105462 | -0.000495 |
| H <sub>t</sub>  | -0.365479 | 2.792337  | 0.000758  |

Table 3: Absolute  $^{15}\text{N}$  NMR isotropic shielding constants of H9-A in vacuum (MP2/aug-cc-pVTZ optimized  $C_1$  geometry in vacuum, see Table 1) calculated using KT3 functional and different basis sets. Also shown are the corresponding relative  $^{15}\text{N}$  NMR spectra with respect to  $\sigma^{N7}$ . t-dzp and t-tzp denote Turbomole-DZP and Turbomole-TZP basis sets, respectively, whereas (a)(c)xz, x=d,t,q, denote (aug-)cc-p(C)VXZ basis sets, respectively. See Figure 1 for atom labeling.

|                | t-dzp | t-tzp | dz    | cdz   | adz   | tz    | ctz   | atz   | qz    | cqz   | aqz   |
|----------------|-------|-------|-------|-------|-------|-------|-------|-------|-------|-------|-------|
| $\sigma^{N1}$  | 46.0  | 27.1  | 42.0  | 34.0  | 41.2  | 29.1  | 21.4  | 30.8  | 25.5  | 18.9  | 24.4  |
| $\sigma^{N3}$  | 52.3  | 34.0  | 48.1  | 40.2  | 49.2  | 36.1  | 28.3  | 38.6  | 32.7  | 26.4  | 32.2  |
| $\sigma^{N6'}$ | 197.4 | 189.6 | 197.1 | 193.6 | 196.0 | 189.0 | 185.9 | 188.3 | 186.6 | 183.7 | 185.6 |
| $\sigma^{N7}$  | 41.0  | 20.0  | 37.3  | 28.4  | 35.9  | 22.3  | 14.1  | 24.9  | 18.9  | 12.2  | 18.2  |
| $\sigma^{N9}$  | 124.8 | 111.6 | 123.5 | 118.2 | 122.6 | 112.8 | 107.4 | 112.5 | 109.4 | 104.8 | 108.3 |
| $\delta^{N1}$  | 5.0   | 7.1   | 4.7   | 5.6   | 5.3   | 6.8   | 7.3   | 5.9   | 6.6   | 6.7   | 6.2   |
| $\delta^{N3}$  | 11.3  | 14.0  | 10.8  | 11.8  | 13.3  | 13.8  | 14.2  | 13.7  | 13.8  | 14.2  | 14.0  |
| $\delta^{N6'}$ | 156.4 | 169.6 | 159.8 | 165.2 | 160.1 | 166.7 | 171.8 | 163.4 | 167.7 | 161.5 | 167.4 |
| $\delta^{N7}$  | 0.0   | 0.0   | 0.0   | 0.0   | 0.0   | 0.0   | 0.0   | 0.0   | 0.0   | 0.0   | 0.0   |
| $\delta^{N9}$  | 83.8  | 91.6  | 86.2  | 89.8  | 86.7  | 93.3  | 93.3  | 87.6  | 90.5  | 92.6  | 90.1  |

Table 4: B97-2 based isotropic  $^2J$  NMR spin-spin coupling constants of the MP2/aug-cc-pVTZ optimized  $C_1$  geometry of H9-A (see Table 1) for different basis sets. atz-J denotes aug-cc-pVTZ-J basis set. See Figure 1 for atom labeling.

|                      | Huz-IIsu2 | Huz-IIIsu3 | Huz-IVsu4 | atz-J  |
|----------------------|-----------|------------|-----------|--------|
| $^2J(\text{N1-H11})$ | -16.20    | -16.35     | -16.43    | -16.57 |
| $^2J(\text{N2-H11})$ | -16.33    | -16.58     | -16.64    | -16.78 |
| $^2J(\text{N4-H15})$ | -12.58    | -12.80     | -12.91    | -12.97 |
| $^2J(\text{N5-H15})$ | -9.32     | -9.53      | -9.59     | -9.72  |

Table 5: CAM-B3LYP based vertical excitation energies,  $E$ , in eV and dimensionless oscillator strengths in length gauge,  $f$ , of H9-A tautomer geometry-optimized at the MP2/aug-cc-pVTZ level in  $C_s$  symmetry (see Table 1). Basis sets used are the Dunning-type correlation-consistent basis sets (d-)(aug-)cc-pVXZ, X = D,T. The three top rows contain data for the three lowest excitation energies in H9-A, and the fourth row refers to the first subsequent intense  $\pi \rightarrow \pi^*$  transition.

|                         | cc-pVDZ |        | aug-cc-pVDZ |        | daug-cc-pVDZ |        | aug-cc-pVTZ |        | daug-cc-pVTZ |        |
|-------------------------|---------|--------|-------------|--------|--------------|--------|-------------|--------|--------------|--------|
|                         | $E$     | $f$    | $E$         | $f$    | $E$          | $f$    | $E$         | $f$    | $E$          | $f$    |
| $n \rightarrow \pi^*$   | 5.463   | 0.0002 | 5.438       | 0.0007 | 5.436        | 0.0008 | 5.438       | 0.0007 | 5.436        | 0.0007 |
| $\pi \rightarrow \pi^*$ | 5.676   | 0.17   | 5.490       | 0.28   | 5.474        | 0.28   | 5.483       | 0.28   | 5.476        | 0.27   |
| $\pi \rightarrow \pi^*$ | 5.792   | 0.12   | 5.617       | 0.01   | 5.607        | 0.01   | 5.613       | 0.01   | 5.609        | 0.01   |
| $\pi \rightarrow \pi^*$ | 6.978   | 0.40   | 6.663       | 0.41   | 6.627        | 0.38   | 6.645       | 0.39   | 6.632        | 0.38   |

Table 6: Force field parameters for the H9-A, H7-A and H3-A tautomers of adenine used in the MD simulations. Partial point charges,  $q$ , are given in au, isotropic polarizabilities,  $\alpha$ , in  $\text{\AA}^3$ , Lennard-Jones parameters  $\epsilon$  and  $\sigma$  in kcal/mol and  $\text{\AA}$ , respectively. See Figure 1 for atom labeling.

| Atom            | H9-A     |          | H7-A     |          | H3-A     |          | $\epsilon$ | $\sigma$ |
|-----------------|----------|----------|----------|----------|----------|----------|------------|----------|
|                 | $q$      | $\alpha$ | $q$      | $\alpha$ | $q$      | $\alpha$ |            |          |
| N1              | -0.72593 | 1.1731   | -0.71794 | 1.1854   | -0.63076 | 1.1812   | 0.17       | 3.25     |
| N3              | -0.74900 | 1.2763   | -0.76100 | 1.2666   | -0.57686 | 1.1452   | 0.17       | 3.25     |
| N6'             | -0.57561 | 1.1197   | -0.59374 | 1.1112   | -0.54607 | 1.1090   | 0.17       | 3.25     |
| N7              | -0.55780 | 1.1841   | -0.45018 | 1.0250   | -0.69986 | 1.2286   | 0.17       | 3.25     |
| N9              | -0.48080 | 1.0217   | -0.65105 | 1.1931   | -0.76462 | 1.2653   | 0.17       | 3.25     |
| C2              | 0.58921  | 1.3193   | 0.58673  | 1.3030   | 0.41210  | 1.3448   | 0.08       | 3.50     |
| C4              | 0.60762  | 1.3398   | 0.85975  | 1.3381   | 0.62999  | 1.4187   | 0.08       | 3.50     |
| C5              | 0.02634  | 1.4050   | -0.20247 | 1.4053   | 0.06547  | 1.5274   | 0.08       | 3.50     |
| C6              | 0.55651  | 1.5335   | 0.57757  | 1.5105   | 0.51503  | 1.5984   | 0.08       | 3.50     |
| C8              | 0.30453  | 1.2432   | 0.34929  | 1.2266   | 0.55137  | 1.3030   | 0.08       | 3.50     |
| H2              | 0.01494  | 0.4374   | 0.01429  | 0.4363   | 0.06090  | 0.4036   | 0.05       | 2.50     |
| H6 <sub>a</sub> | 0.29728  | 0.3587   | 0.29868  | 0.3567   | 0.29555  | 0.3494   | 0.00       | 0.00     |
| H6 <sub>b</sub> | 0.27534  | 0.3025   | 0.26785  | 0.3199   | 0.29651  | 0.2851   | 0.00       | 0.00     |
| H8              | 0.07478  | 0.4307   | 0.06808  | 0.4240   | 0.01644  | 0.4455   | 0.05       | 2.50     |
| H <sub>t</sub>  | 0.34259  | 0.3416   | 0.35414  | 0.3243   | 0.37481  | 0.3306   | 0.00       | 0.00     |

Table 7: Force field parameters for water molecules used in the MD simulations and QM/MM calculations. Partial point charges,  $q$ , are given in au, isotropic polarizabilities,  $\alpha$ , in  $\text{\AA}^3$ , Lennard-Jones parameters  $\epsilon$  and  $\sigma$  in kcal/mol and  $\text{\AA}$ , respectively.

| Atom | $q$     | $\alpha$ | $\epsilon$ | $\sigma$ |
|------|---------|----------|------------|----------|
| O    | -0.6690 | 1.440    | 0.1555     | 3.166    |
| H    | 0.3345  | 0.000    | 0.0000     | 0.000    |
